# Supplementary material
Source: publisher figshare collection journal article supplement (https://tandf.figshare.com/ndownloader/files/13392599)
Supplement: Supplementary file 1 [file 13392599]

Footnotes of Table 1

1. Acetate. Retrieved from http://www.manufacturingterms.com/Acetate.html

2. Characteristic of fibres. World In A Spin, 4036 Indian Manor Drive, Stone Mountain, GA 30083, USA. Retrieved from http://www.worldinaspin.com/articles/characteristics

3. What is acrylic fabric? https://www.naturalclothing.com/what-is-acrylic-fabric/

4. Cotton, natural fibres, synthetic fibres. Swicofil AG. Gerliwilstr 23, 6020 Emmenbrücke, Switzerland. Retrieved from http://www.swicofil.com/products/001cotton.html

5. Linen, natural fibres, synthetic fibres. Retrieved from http://www.swicofil.com/products/003flax.html

6. Burda, la couture pratique, Album, 2007, Ed.: Fleurus, Collection: De fil en aiguille.

7. Polyamide, natural fibres, synthetic fibres. Retrieved from http://www.swicofil.com/pa.html

8. Polyester, natural fibres, synthetic fibres. Retrieved from http://www.swicofil.com/products/226polyester.html

9. Polyester fleece. Retrieved from http://www.madehow.com/Volume-4/Polyester-Fleece.html

10. Bajaj, P. (1996). Recent advances in the development of silk-like polyester fabrics
Indian Journal of Fibre and Textile Research, 21: 79-89

11. Viscose, natural fibres, synthetic fibres. Swicofil AG. Gerliwilstr 23, 6020 Emmenbrücke, Switzerland. Retrieved from http://www.swicofil.com/viscose.html

12. Ingham, J. (1950). The importance of humidity in the processing of the wool fibre. Journal of the Textile Institute Proceedings, Journal of the Textile Institute Proceedings, Taylor & Francis, 41: 7-8
